# Supplementary material for: Solution-processed indium oxide electron transporting layers for high-performance and photo-stable perovskite and organic solar cells
Source: Royal Society of Chemistry journal article supplement (doi:10.1039/c7nr05695h), 2017-01-01
Supplement: c7nr05695h1.pdf [file c7nr05695h1.pdf]

## Supplementary Information

### **Solution-processed indium oxide electron transporting layer for high-performance and photo-stable perovskite and organic solar cells**

Seokhyun Yoon,<sup>1a</sup> Si Joon Kim,<sup>2a</sup> Harrison S. Kim<sup>2</sup>, Joon-Suh Park,<sup>3</sup> Il Ki Han,<sup>3</sup> Jae Woong Jung,<sup>4\*</sup> Minwoo Park<sup>5\*</sup>

Dr. S. Yoon

School of Electrical and Electronic Engineering, Yonsei University, Seoul 03722, Korea

Dr. S. J. Kim and H. S. Kim

Department of Materials Science and Engineering, The University of Texas at Dallas, 800 W. Campbell Road, Richardson, Texas 75080, United States

J. -S. Park and Dr. I. K. Han

Nanophotonics Research Center, Korea Institute of Science and Technology (KIST), Seoul 02792, Korea

Prof. J. W. Jung

Department of Advanced Materials Engineering for Information & Electronics, Kyung Hee University, Gyeonggi-do 17104 Korea

Prof. M. Park

Department of Chemical and Biological Engineering, Sookmyung Women's University, Seoul, 04310, Korea

Corresponding author: J. W. Jung and M. Park (mwpark@sm.ac.kr)

<sup>a</sup> These authors are equally contributed to this work.

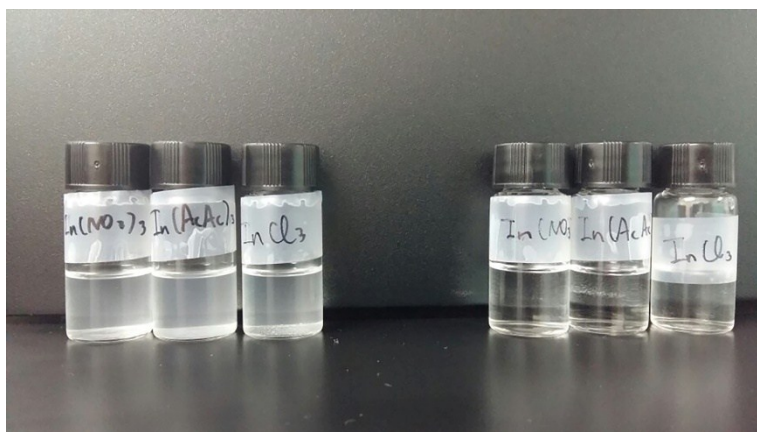

**Figure S1.** Photograph of the In precursor ( $\text{In}(\text{NO}_3)_3 \cdot x\text{H}_2\text{O}$ ,  $\text{In}(\text{AcAc})_3$ , and  $\text{InCl}_3$ ) solutions (0.1 M) prepared by dissolving the precursors in ethanol containing  $>0.2\%$  water (**left**) and anhydrous ethanol (**right**). The solutions were held for 1 h.

**Table S1.** Bonding ratios of In-O,  $\text{O}_{\text{vac}}$  and In-OH obtained from XPS peaks of the  $\text{In}_2\text{O}_3$  ETLs at  $T = 200\text{ }^\circ\text{C} - 500\text{ }^\circ\text{C}$ .

| Temp.<br>[ $^\circ\text{C}$ ] | In-O<br>[%] | $\text{O}_{\text{vac}}$<br>[%] | In-OH<br>[%] |
|-------------------------------|-------------|--------------------------------|--------------|
| 200                           | 58.62       | 9.19                           | 32.19        |
| 300                           | 68.08       | 22.9                           | 9.02         |
| 400                           | 69.56       | 21.33                          | 9.11         |
| 500                           | 69.90       | 20.24                          | 10.16        |

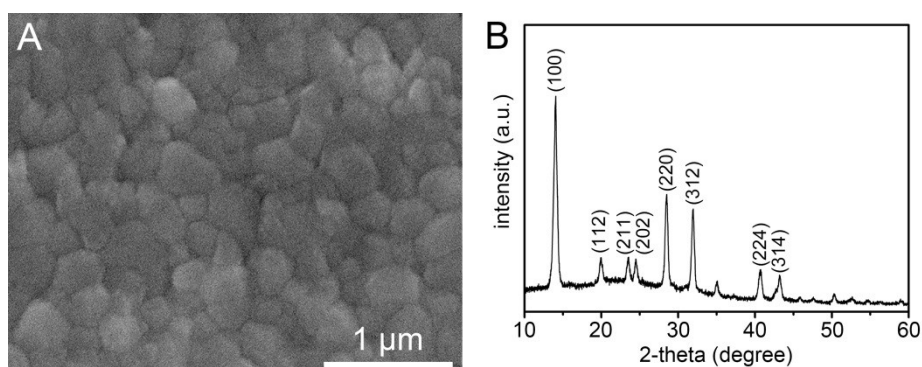

**Figure S2.** (A) SEM image of the  $\text{CH}_3\text{NH}_3\text{PbI}_3$  thin film deposited onto the  $\text{In}_2\text{O}_3$  ETL. (B) XRD spectrum of the  $\text{CH}_3\text{NH}_3\text{PbI}_3$  thin film. The characteristic peaks of  $\text{In}_2\text{O}_3$  are

removed.

**Table S2.** Time-resolved photoluminescence (TRPL) parameters fitted using a bi-exponential decay function.<sup>a)</sup>

| Temp.<br>[°C] | a <sub>1</sub> | τ <sub>1</sub><br>[ns] | a <sub>2</sub> | τ <sub>2</sub><br>[ns] | τ <sub>avg</sub> <sup>b)</sup><br>[ns] |
|---------------|----------------|------------------------|----------------|------------------------|----------------------------------------|
| 200           | 0.508          | 2.981                  | 0.484          | 22.73                  | 12.51                                  |
| 300           | 0.898          | 2.485                  | 0.128          | 20.25                  | 1.95                                   |
| 400           | 0.802          | 2.101                  | 0.227          | 17.16                  | 3.28                                   |
| 500           | 0.525          | 3.134                  | 0.473          | 9.496                  | 6.14                                   |

<sup>a)</sup> Fit function =  $a_1 e^{-t/\tau_1} + a_2 e^{-t/\tau_2}$

<sup>b)</sup>  $\tau_{avg} = (\sum_i a_i \tau_i) / (\sum_i a_i)$ , where  $\sum_i a_i = 1$

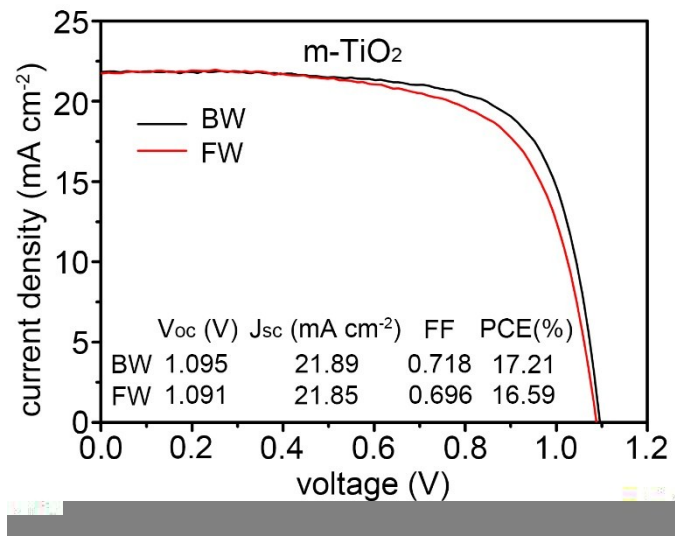

**Figure S3.** J-V curves of the mesoporous TiO<sub>2</sub>-PSC measured with the backward-forward sweep at a scan-delay time of 200 ms.

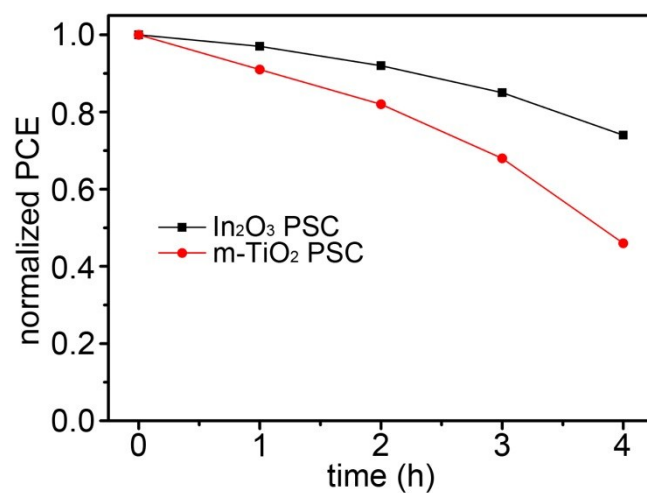

**Figure S4.** Normalized PCEs of the  $\text{In}_2\text{O}_3$ -PSC and the  $\text{TiO}_2$ -PSC measured under 1 sun illumination at a relative humidity of 30 % and 32 °C for 4 h.

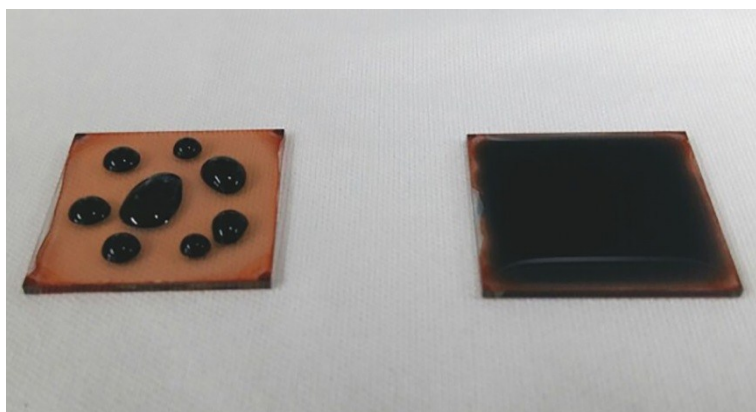

**Figure S5.** Photograph for wettability test of PEDOT:PSS (**left**) and modified PEDOT:PSS with Triton X-100 (**right**) on a P3HT:PCBM layer.

**Table S3.** Series resistance ( $R_s$ ) and shunt resistance ( $R_{sh}$ ) of PSCs and OSCs.

| Temp.<br>[°C] | PSC                |                        | OSC                |                        |
|---------------|--------------------|------------------------|--------------------|------------------------|
|               | $R_s$ [ $\Omega$ ] | $R_{sh}$ [k $\Omega$ ] | $R_s$ [ $\Omega$ ] | $R_{sh}$ [k $\Omega$ ] |
| 200           | 154                | 8.33                   | 358                | 1.45                   |
| 300           | 33                 | 13.55                  | 74                 | 7.96                   |
| 400           | 51                 | 11.97                  | 110                | 6.48                   |
| 500           | 94                 | 97.59                  | 188                | 2.13                   |
